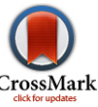

# Cyclophilin A (CypA) Interacts with NF- $\kappa$ B Subunit, p65/RelA, and Contributes to NF- $\kappa$ B Activation Signaling

Shan Sun<sup>1,9</sup>, Mian Guo<sup>1,2,9</sup>, James Beiji Zhang<sup>1</sup>, Albert Ha<sup>1</sup>, Kazunari K. Yokoyama<sup>3</sup>, Robert H. Chiu<sup>1,4\*</sup>

**1** Dental and Craniofacial Research Institute and School of Dentistry, University of California, Los Angeles, CA, United States of America, **2** Department of Neurosurgery, the 2nd Affiliated Hospital of Harbin Medical University, Harbin, Heilongjiang, China, **3** Graduate Institute of Medicine, Kaohsiung Medical University, Kaohsiung, Taiwan, **4** Surgical Oncology & Jonsson Comprehensive Cancer Center, University of California, Los Angeles, CA, United States of America

## Abstract

**Background:** Peptidyl-prolyl isomerase cyclophilin A (CypA) plays important roles in signaling, protein translocation, inflammation, and cancer formation. However, little is known about the mechanisms by which CypA exerts its effects. C57BL/6 *Ppia* (encoding *CypA*)-deficient embryonic fibroblasts show reduced activation of the nuclear factor kappa-light-chain-enhancer of activated B cells (NF- $\kappa$ B), the p65/RelA subunit, suggesting that CypA may mediate modulation of NF- $\kappa$ B activity to exert its biological effects.

**Methodology:** Western blotting and qRT-PCR analyses were used to evaluate the association of CypA deficiency with reduced activation of NF- $\kappa$ B/p65 at the protein level. GST pull-down and co-immunoprecipitation were used to examine interactions between CypA and p65/RelA. Truncation mutants and site-directed mutagenesis were used to determine the sequences of p65/RelA required for interactions with CypA. Enhancement of p65/RelA nuclear translocation by CypA was assessed by co-transfection and immunofluorescent imaging. Treatment of cells with cycloheximide that were harvested at various time points for Western blot analyses was carried out to evaluate p65/RelA protein stability. The functional activity of NF- $\kappa$ B was assessed by electrophoretic mobility-shift assays (EMSA), luciferase assays, and changes in expression levels of target genes.

**Results:** GST pull-down assays *in vitro* and co-immunoprecipitation analyses *in vivo* provided evidence for protein-protein interactions. These interactions were further supported by identification of a CypA-binding consensus-like sequence within NF- $\kappa$ B subunit p65 at the N-terminal 170–176 amino acid residues. Significantly, CypA provided stability for NF- $\kappa$ B p65 and promoted NF- $\kappa$ B p65 nuclear translocation, resulting in increased nuclear accumulation and enhanced NF- $\kappa$ B activity.

**Conclusions:** Our findings revealed important mechanisms that regulate NF- $\kappa$ B activation, and offer new insights into the role of CypA in aberrant activation of NF- $\kappa$ B-mediated signaling for altered expression of its target genes, resulting in pathological effects in various diseases.

**Citation:** Sun S, Guo M, Zhang JB, Ha A, Yokoyama KK, et al. (2014) Cyclophilin A (CypA) Interacts with NF- $\kappa$ B Subunit, p65/RelA, and Contributes to NF- $\kappa$ B Activation Signaling. PLoS ONE 9(8): e96211. doi:10.1371/journal.pone.0096211

**Editor:** Philippe A. Gally, Scripps Research Institute, United States of America

**Received:** January 17, 2014; **Accepted:** April 4, 2014; **Published:** August 12, 2014

**Copyright:** © 2014 Sun et al. This is an open-access article distributed under the terms of the Creative Commons Attribution License, which permits unrestricted use, distribution, and reproduction in any medium, provided the original author and source are credited.

**Funding:** This work was supported in part by a research fund from the UCLA Dental and Craniofacial Research Institute. No additional funding received for this study. The funder had no role in study design, data collection and analysis, decision to publish or preparation of the manuscript.

**Competing Interests:** The authors have declared that no competing interests exist.

\* Email: rchiu@dentistry.ucla.edu

9 These authors contributed equally to this work.

‡ Current address: School of Life Science, Tsinghua University, Beijing, China

## Introduction

Nuclear factor  $\kappa$ B (NF- $\kappa$ B) is a set of multifunctional transcription factors that regulate expression of genes involved in numerous normal cellular activities [1,2]. In addition to the well-established role of NF- $\kappa$ B in both immunity and inflammation, deregulation of NF- $\kappa$ B signaling is associated with cancer malignancies, diabetes, and atherosclerosis, further emphasizing the wide spectrum of roles it plays in control of normal growth, tissue homeostasis, and diseases [3,4,5]. A heterodimeric complex of p65/RelA and p50 is the most common form of NF- $\kappa$ B in mammalian cells, and is commonly referred to as NF- $\kappa$ B. Given the protein functions of NF- $\kappa$ B to positively regulate gene expression, there is an inhibitory  $\kappa$ B (I $\kappa$ B) family of NF- $\kappa$ B

inhibitory proteins called I $\kappa$ Bs, which retain NF- $\kappa$ B dimers in the cytoplasm of unstimulated cells [6]. A myriad of endogenous and exogenous stimuli, such as tumor necrosis factor alpha (TNF- $\alpha$ ) and interleukin 1 $\beta$  (IL-1 $\beta$ ) are capable of inducing activation of the I $\kappa$ B kinase (IKK) complex, which leads to ubiquitin-dependent degradation of I $\kappa$ B $\alpha$ . NF- $\kappa$ B is then free to shuttle into the nucleus and bind to specific sequences in the promoter or enhancer regions of its target genes [7].

Although the molecular events that control translocation of NF- $\kappa$ B from the cytoplasm to the nucleus are well characterized [7], knowledge concerning the regulation of NF- $\kappa$ B's activity inside the nucleus still remains largely unclear. NF- $\kappa$ B is believed to recruit co-factors to form a much higher order transcription complex than

previously expected [8]. Among the well-characterized NF- $\kappa$ B co-activators, p300/CREB-binding protein (CBP) appears to be a basal component of a functional NF- $\kappa$ B transcription complex [9,10]. A recent report demonstrated that LRP16 integrates into the NF- $\kappa$ B transcriptional complex by associating with its p65 component, and is required for its functional activation [11].

CypA is a member of the peptidyl-prolyl isomerase (PPIase) family, a group of proteins that catalyze *cis-trans* isomerization of peptidyl-prolyl bonds during protein folding and/or conformational changes [12,13]. CypA was first identified as the primary intracellular target of the immunosuppressive drug, CsA [14]. The immunosuppressive activity of CsA is thought to result from engagement of calcineurin by the CsA-CypA complex [15], an observation supported by the finding that CypA knockout mice are resistant to immunosuppression by CsA [16]. One of the other inhibitory effects of CsA on T cell proliferation is to inhibit the early phase of NF- $\kappa$ B/RelA activation by CD28 costimulatory signaling to reduce the IL-2 expression [17]. In addition, CsA affected not only immune cells but also on non-lymphoid lineages and induced insensitiveness to inflammatory cytokines, especially to TNF- $\alpha$ . It has been demonstrated that CsA inhibited TNF- $\alpha$ -triggered MCP-1 induction via unfolded protein response (UPR)-mediated suppression of NF- $\kappa$ B. This suppression of NF- $\kappa$ B by UPR was, at least in part, via induction of C/EBP family members [18].

Several lines of research have revealed that PPIase such as CypA may function as molecular signaling “switches” that can act as novel molecular timers to help control the amplitude and duration of a cellular process [19]. Moreover, the role of CypA nuclear translocation, CypA’s participation in activation of other factors or their nuclear translocation also impacts various cellular functions [20–23]. One recent report demonstrated that knock-down of CypA inhibited signal transducer and activator of transcription 3 (Stat3) interleukin-6-induced tyrosine phosphorylation and nuclear translocation, resulting in altered gene expression in myeloma cell lines [24]. In rheumatoid arthritis patients, over-expressed extracellular CypA stimulates production of inflammatory cytokines such as TNF- $\alpha$ , IL-1 $\beta$ , IL-8, monocyte chemoattractant protein-1 (MCP-1), and matrix metalloproteinase 9 (MMP-9) [25]. These extracellular CypA-stimulated products could arise through a pathway that is dependent on NF- $\kappa$ B activation. Similarly, stably expressed CypA in the SK-Hep1 cell line revealed that the intracellular CypA up-regulates the expression of many cytokine-related genes such as IL-8, IL-1 $\beta$ , IL-6, CXCL1, CXCL2, and CXCL3 [26]. These up-regulated cytokines and chemokines may confer tumor cell growth advantage in the neoplastic microenvironment. We have reported that NF- $\kappa$ B accumulation and activation is tightly regulated by intracellular CypA, which suggests that CypA may be an important contributor to aberrant activation of NF- $\kappa$ B in cancer [27].

## Materials and Methods

### Compounds and Animals

Cyclosporin A (CsA) was purchased from Sigma-Aldrich (St. Louis, MO). Sanglifehrin A (Sfa) was kindly provided by Novartis Pharmaceuticals (Basel, Switzerland) dissolved in DMSO at  $10^{-3}$  mol/l and stored at  $-20^{\circ}\text{C}$ . Samples were diluted freshly in culture medium at the concentrations indicated. We purchased 129s6/svEV *Ppia*<sup>+/-</sup> mice from Jackson Laboratory and backcrossed to C57BL/6 *Ppia*<sup>+/+</sup> mice for eight generations before use in our experiments. All animal studies were carried out in strict accordance with experimental protocols that were approved by the

Institutional Animal Care and Use Committee at the University of California, Los Angeles. UCLA’s animal welfare assurance number with Department of Health and Human Services Office of Laboratory Animal Welfare is A3196-01. All surgery was performed under sodium pentobarbital anesthesia, and all efforts were made to minimize suffering.

### Cell Culture and Preparation of Nuclear and Cytoplasmic Extracts

Mouse embryonic fibroblasts (MEFs) were isolated from embryos at embryonic day (E13.5) of pregnant C57BL/6 *Ppia*<sup>+/-</sup> mice as described [28]. MEFs were cultured in DMEM-high glucose medium supplemented with 20% FBS and antibiotics (penicillin and streptomycin) (Invitrogen, Grand Island, NY).

C2C12 (a murine myoblast cell line), 293T (a human kidney cell line), and HeLa (a human cervical carcinoma cell line) were cultured in DMEM-high glucose medium (Invitrogen) supplemented with 10% FBS (Invitrogen) and antibiotics penicillin and streptomycin (Invitrogen). All cells were cultured at  $37^{\circ}\text{C}$  with 5%  $\text{CO}_2$  in a humidified incubator. Preparation of nuclear and cytoplasmic extracts was carried out as described previously [29]. Aliquots of extracts were used for electrophoretic mobility-shift assays (EMSA).

### GST Pull-Down Assays, Co-Immunoprecipitation, and Immunoblot Analysis

GST pull-down assays and co-immunoprecipitation (Co-IP) were carried out as described previously [29,30]. Briefly, 800  $\mu\text{g}$  of cell lysate was incubated with anti-myc or anti-HA antibodies (Cell Signaling Technology, Danvers, MA) at  $4^{\circ}\text{C}$  overnight in a clinical rotor. Protein A/G PLUS-agarose beads were then added to the mixture and the tubes were briefly centrifuged at 1000 g at  $4^{\circ}\text{C}$  for 30 seconds to precipitate the beads bound to the Ag-Ab complex. The beads were washed extensively. After the final wash, the beads were centrifuged at 10,000 g for one minute, and all the liquid was thoroughly removed. Fifty  $\mu\text{L}$  of SDS sample loading buffer containing 10%  $\beta$ -mercaptoethanol was then added to the agarose beads and heated at  $95^{\circ}\text{C}$  for 5 minutes. The denatured proteins were subjected to Western blot analysis probing with anti-HA or anti-myc antibody.

### Electrophoretic Mobility-shift Assays (EMSAs) and Luciferase Analysis

Nuclear extracts were prepared from *Ppia*<sup>+/+</sup> and *Ppia*<sup>+/-</sup> MEFs, and aliquots of extracts were used for EMSA assays. EMSA was performed using the Light Shift Chemiluminescent EMSA Kit (Pierce Biotechnology, Rockford, IL) according to the manufacturer’s instructions. In brief, 100 fmol of biotin end-labeled probe was incubated with 15  $\mu\text{g}$  of nuclear extract, and then electrophoresed on a native polyacrylamide gel. The DNA was transferred to a nylon membrane, UV cross-linked, probed with the streptavidin-horseradish peroxidase conjugate, and chemiluminescent substrate was used for detection. 5’-biotin labeled NF- $\kappa$ B oligo, 5’-AGTTGAGGGGACTTTCCCAGGC-3’, was purchased from Sigma-Aldrich. For competition experiments, 100-fold molar excess of unlabeled oligo was used.

Luciferase reporter assays were carried out as described previously [27]. The luciferase reporter plasmids, pGL4 nf- $\kappa$ B-Luc with consensus NF- $\kappa$ B binding sequence GGGACTTCC and its mutant with mutated sequence (CTCACTTCC), were transfected into HeLa, MEFs, or U87vIII cells with *Renilla* luciferase plasmid, using lipofectamine 2000 (Invitrogen, Carlsbad, CA). Firefly and *Renilla* luciferase activity were measured with the

dual-luciferase reporter assay system (Promega, Madison, WI). Results are presented as relative reporter activity after normalization to the Renilla luciferase activity.

### Constructs and Site-Directed Mutagenesis

Mutagenesis of p65 DNA sequences was synthesized using a conventional PCR method with primers specifically designed to amplify the targeted mutation sites. The targeted amino acid residues were at 170, 172, and 176 in the sequence of PSGRPLRLP (aa 168–176) of p65, a potential binding sequence for CypA. All primers were designed using oligo synthesis (Sigma-Aldrich, St. Louis, MO) to contain restriction enzyme recognition sequences for cloning and the necessary nucleic acid mutations in order to introduce the amino acid changes post-translation. Two constructs containing the mutation sites, spinning amino acid residues 2–221 and 2–551, were constructed by two sets of primers in two separate PCR reactions, then “sewn” together with a third PCR reaction. For generation of the HA-2-221 (G170A/P172A/P176A) mutant, the first set of primers (F: 5'-AACTCGAGATG-tatccatgatgctcccagactctgccGGATCCGACGAA-CTGTTCCCC-CTC-3' and R: 5'-GATGAGAAAGGACAGGtgcCAGCGG-AGggcCC-TggcTGATG-3') were used for amplification with a template of a previously constructed p65 2–221. The second set of primers (F: 5'-ATCAGccAGGgccCTCCGCCTGgcaCCT-G-TCCTTCTCATC-3' and R: 5'-GACAAGCTTTTATTTCTGACACCTTGTCACACA-G-3') were used with the same template to amplify the second segment. Lastly, the two PCR products were used as the template with the forward primer from the first reaction and the reverse primer from the second reaction sewn together to generate the HA-p65 2–221 mutated fragment. This fragment contains the BamHI DNA recognition sequence on the 5' end and the HindIII recognition sequence on the 3' end, which was cloned into HindIII/BamHI cloning sites of vector pcDNA3.1 (-) (Invitrogen). Ten mM of dNTP mix and platinum *Pfx* polymerase were used with the supplied buffer and salt solutions to ensure high accuracy and fidelity of the PCR amplification (all from Invitrogen).

The HA-p65 (2–551) (G170A/P172A/P176A) mutant was generated using similar techniques; i.e., sewing two fragments together to form the HA-p65 (2–551) mutant. The first fragment was the final product from the first synthesis of HA-p65 (2–221), and the second fragment was generated with a plasmid containing full-length HA-p65 as the template. The forward primer 5'-ATCAGccAGGgccCTCCGCCTGgcaCCTGTCTTCTCATC-3' and reverse primer 5'-GACAAGCTTTTAGGAGCTGATCTGACTCA-GCAG-3' were used to create the desired mutations in the second fragment. Afterwards, the two created PCR products were mixed as a template for amplification with the forward primer, which was used to generate the first HA-p65 (2–221) mutant fragment, and the reverse primer, which was used for the second PCR product, the p65 (170–551) mutant fragment. The final amplified full-length HA-p65 (2–551) also contained the BamHI site on the 5' end and the HindIII site at the 3' end for cloning into a vector.

### Protein Stability Assays

Comparison of p65 and its mutant for stability, HA-tagged p65 or its mutant HA-tagged p65 (G170A/P172A/P176A), were transfected into 293T or MEF (*Ppia*<sup>-/-</sup>) cells with HA-LacZ for 24 hr. Cells were treated with 5  $\mu$ g/ml cycloheximide (EMD Biosciences, San Diego, CA) and harvested at the various time points, followed by immunoblotting with anti-HA antibody and semi-quantification with ImageJ.

To determine whether p65 degradation was due to the function of ubiquitin proteasomes, the proteasome inhibitor MG132 (EMD Biosciences) and cycloheximide were added to the 24 hr post-transfected cells and harvested at indicated time points, followed by Western blot analysis.

### Reverse Transcription and Quantitative Real-Time PCR (qRT-PCR) Analysis

Real time RT-PCR was used to analyze the RNA levels of p50 and p65 in MEFs, and of IL-1 $\beta$ , IL-6, and IL-8 in U87vIII cells. Using the cDNA synthesized from the SuperScript III First-Strand Synthesis System as templates, individual specific primers (p65 F, 5'-GACGACTGTTCCCCCTC-3' and R, 5'-CCTCGCACTTGTAGCGG-3'; p50 F, 5'-GCAAACCTGGGAATACCTTCATGTGACTAAG-3' and R, 5'-ATAGGCAA-CCTCAGAATG-CACCAGAAGTCC-3'; IL-1 $\beta$  F, 5'-TGCGTGTGAAAGATGATAA-G-3' and R, 5'-TTGGGGAACTGGGCAGAC-3'; IL-6 F, 5'-CTCCAGAACAGATTT-GAGAGTAGTG-3' and R, 5'-TTGTGGTTGGGTCAGGGGTG-3'; IL-8 F, 5'-GGGTTGTGGAGAAGTTTTG-3' and R, 5'-GTTTCACTGGCATCTTCACTG-3') were added to each template and mixed with the *Power SYBR Green PCR Master Mix* (Life Technologies, Gaithersburg, MD). The reactions were performed using the 7300 Real-Time PCR System instrument (Applied Biosystems, Foster City, CA). The samples were incubated in 96-well optical plates at 95°C for 10 minutes, followed by 40 cycles at 95°C for 15 seconds and 60°C for 10 seconds. The threshold cycle (*Ct*) was determined using default threshold settings, and the *Ct* value was defined as the fractional cycle number at which the fluorescence passes the fixed threshold.

### Statistical Analysis

*In vitro* experiments were performed in triplicate and repeated at least twice; a representative experiment (mean  $\pm$  SE) was selected for the figures. Statistical significance of differences observed in experimental data compared with control was determined by the t test or one-way ANOVA statistical analysis. The minimal level of significance was \**p*<0.05 and \*\**p*<0.01.

## Results

### Down-Regulated NF- $\kappa$ B/p65 Correlates with CypA Deficiency

We have demonstrated that RNA interference knock-down of endogenous CypA (CypA Kd) in glioblastoma cells led to impaired NF- $\kappa$ B activity and significantly attenuated NF- $\kappa$ B-dependent gene expression [27]. To determine whether NF- $\kappa$ B activity is also reduced in CypA-deficient mice or other cell lines, we measured basal levels of the nuclear NF- $\kappa$ B subunit, p65, in mouse embryonic fibroblasts (MEFs) isolated from cyclophilin A (CypA) knockout (*Ppia*<sup>-/-</sup>) mice and the CypA knocked-down mouse myoblast cell line, C2C12. Western blot analysis revealed that nuclear NF- $\kappa$ B/p65 levels, but not the other subunits of NF- $\kappa$ B, were lower in *Ppia*<sup>-/-</sup> MEFs and CypA Kd C2C12 cells compared to those in wild-type cells (Figs. 1A, 1B). These results suggest that the CypA KO or Kd was specifically associated with lower levels of p65, which is a subunit of multifunctional transcription factor NF- $\kappa$ B that regulates expression of genes involved in numerous normal cellular activities [31]. Furthermore, data obtained from qRT-PCR indicated that decreased NF- $\kappa$ B/p65 does not occur at the transcriptional level (Fig. 1C), suggesting that down-regulated NF- $\kappa$ B/p65 could occur at posttranslational levels. To exam whether cyclosporine A (CsA) and a non-immunosuppressive analog, sanglifhrin A (Sfa), could also

suppress p65/RelA, we treated MEF with CsA (1.0  $\mu$ M) and Sfa (100 nM) to inhibit CypA isomerase activity, followed by examining p65/RelA expression levels in cytoplasmic and nuclear extracts. The results demonstrated that reduced p65/RelA expression levels by treatment with CypA inhibitors are similar to the reduced p65 levels in CypA Kd or CypA-KO cells, suggesting that CypA isomerase activity is correlated with expression levels of p65/RelA (Fig. 1D).

### CypA binds to p65, A Subunit of NF- $\kappa$ B

There is growing evidence for a role for peptidyl-prolyl isomerases (PPIases) in transcriptional control. Various PPIases were found to interact with transcription factors and affect their activity [32,33,24]. To explore the possibility of CypA interacting with NF- $\kappa$ B components, we performed GST-CypA pull-down assays, using cell lysates from the glioblastoma cell line, U87vIII. The pull-down proteins were subjected to immunoblot analysis with anti-p65 antibody. As shown in Fig. 2A, CypA interacted with p65. To confirm the results obtained from the GST-CypA pull-down assay, *in vivo* interactions of expressed HA-p65 and myc-CypA were performed by co-immunoprecipitation. Cell lysates prepared from 293T cells expressing HA-p65 and myc-CypA plasmids were immunoprecipitated with anti-HA antibody (Roche Applied Science, Madison, WI) or anti-myc antibody (Cell Signalling Technology, Beverly, MA), followed by immunoblot analysis for myc-CypA and HA-p65, respectively. As shown in Fig. 2B, immunoprecipitation with anti-HA antibody, followed by Western blotting with anti-myc antibody or vice versa, demonstrated that CypA co-immunoprecipitates with p65.

### Identification of a CypA-Interacting Domain of p65, A Subunit of NF- $\kappa$ B

To localize the region of p65 that directly interacts with CypA, we generate three HA-tagged truncation mutants and subjected them to *in vivo* interactions with myc-CypA by co-immunoprecipitation. Truncation 1 (A-fragment), spanning amino acid residues 1–221, contains one potential consensus sequence for CypA-binding; truncation 2 (B-fragment), spanning amino acid residues 220–335, contain a previously identified Pin1-binding site [33]; and truncation 3 (C-fragment), spanning amino acid residues 334–551, contains one potential consensus sequence for CypA-binding (Figs. 2C, D). Cell lysates prepared from cells expressing wild-type HA-tagged p65 or HA-tagged truncation fragments and myc-CypA were immunoprecipitated with anti-myc antibody, followed by immunoblotting with anti-HA antibody. The results clearly demonstrated that truncation A-fragment contains a CypA-binding site (Fig. 2C, lane 6).

To further identify the functional binding site of CypA on the truncation A-fragment, we constructed two truncation mutants, HA-2-169 and HA-170-335, from the truncation A-fragment. Cell lysates containing expressed HA-2-169 and myc-CypA or HA-170-335 and myc-CypA had no interaction between either truncated mutants with CypA, suggesting that the binding site identified on the truncation A-fragment had been disrupted (Fig. 2C, lanes 16 and 17). Moreover, we constructed a HA-tagged expression plasmid with a mutation (G170A/P172A/P176A) in the potential CypA-binding consensus sequence, GRPLRLP, spanning amino acid residues 170–176. Cell lysates prepared from 293T cells expressing HA-tagged 2–221mut and 2–551mut lost their co-immunoprecipitation with co-expressed myc-CypA (Fig. 2C, lanes 26 and 29). These results demonstrated that amino

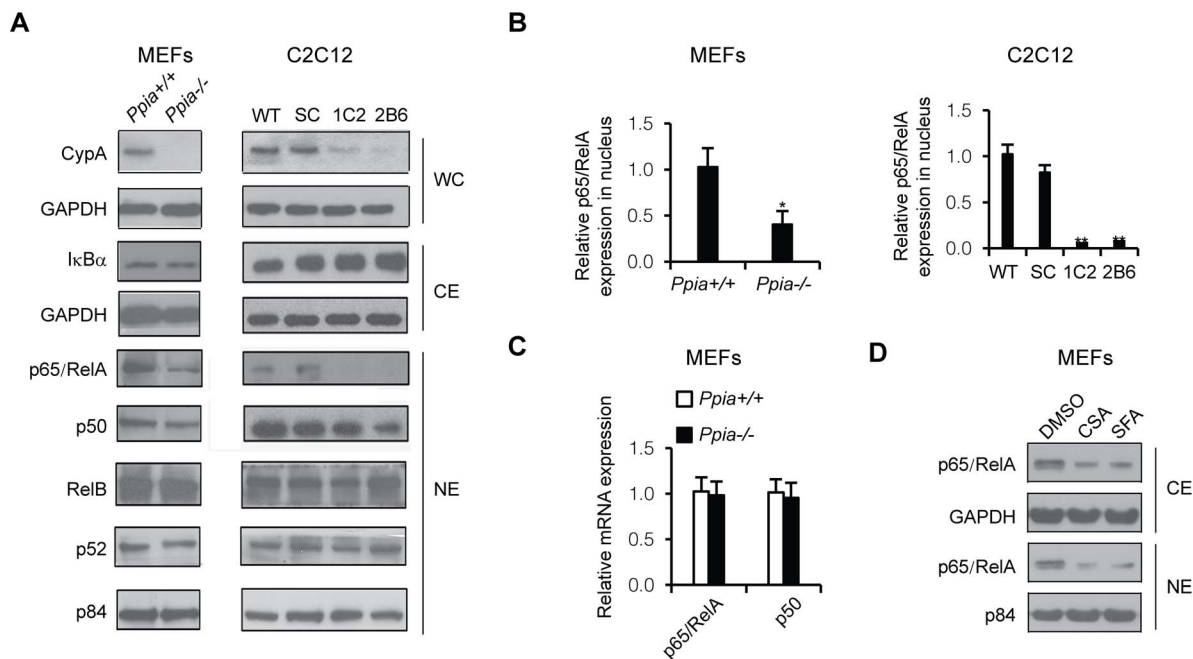

**Figure 1. CypA deficiency reduces activated NF- $\kappa$ B/p65 (RelA) expression.** (A) Western blot analysis of CypA, NF- $\kappa$ B subunits and their inhibitory protein, I $\kappa$ B $\alpha$ . Cytoplasmic extracts isolated from MEFs and C2C12 cells were immunoblotted for I $\kappa$ B $\alpha$ , and GAPDH was used as internal control. Nuclear extracts prepared from MEFs and C2C12 cells were subjected to Western blot analysis to detect p65/RelA, p50, RelB, and p52 expression levels. p84 served as an internal control. *Ppia*<sup>+/+</sup> and *Ppia*<sup>-/-</sup> represent CypA WT and CypA KO, respectively. SC is a scrambled clone, and 1C2 and 2B6 are C2C12 CypA Kd clones. (B) Semi-quantitative analysis of relative expression levels of p65/RelA in MEFs (*Ppia*<sup>+/+</sup> vs *Ppia*<sup>-/-</sup>) and C2C12 cells (WT, SC vs 1C2 and 2B6). (C) qRT-PCR analysis of relative mRNA expression levels of p65/RelA and p50 between *Ppia*<sup>+/+</sup> and *Ppia*<sup>-/-</sup> MEFs. (D) p65/RelA expression levels in MEF cytoplasmic extract (CE) and nuclear extracts (NE) upon treatment cells with CsA and Sfa. doi:10.1371/journal.pone.0096211.g001

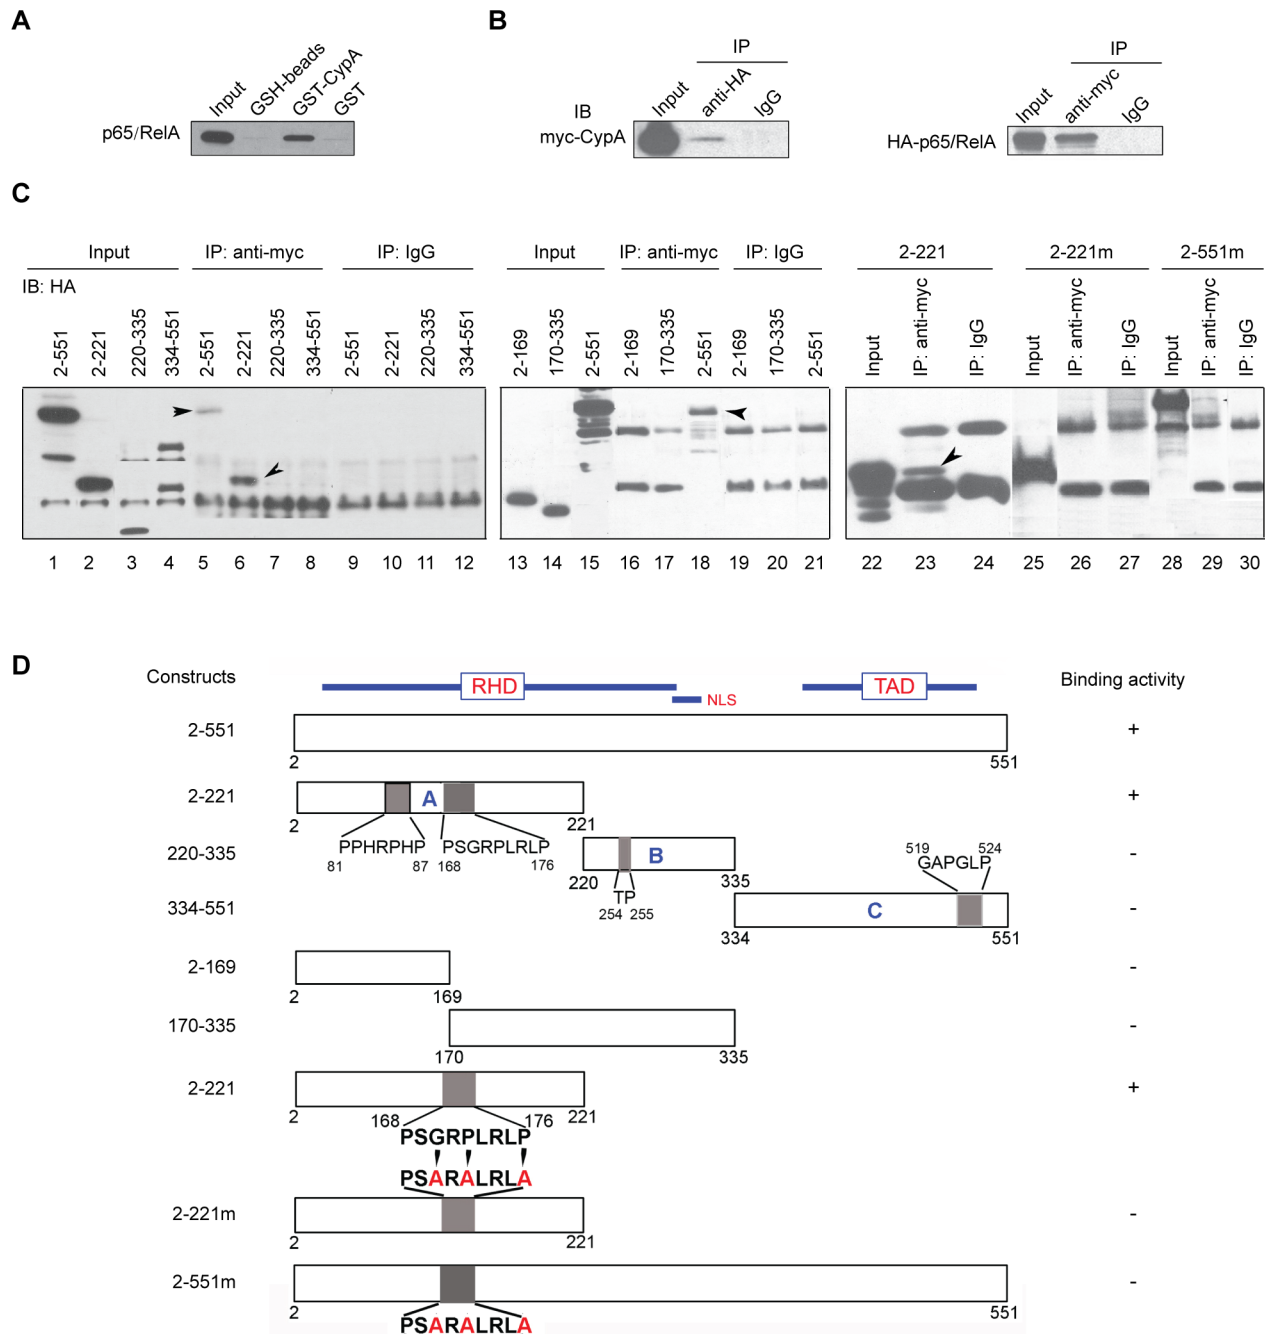

**Figure 2. Interaction of CypA with the NF-κB subunit, p65/RelA.** (A) GST pull-down assays. GST-CypA was immobilized on GSH-sepharose 4B beads, then incubated with glioblastoma cell line U87vIII whole-cell lysates. The complexes were resolved by SDS-PAGE and transferred to nitrocellulose membranes, followed by probing with anti-p65/RelA antibody. (B) Co-immunoprecipitation of myc-tagged CypA (myc-CypA) with HA-tagged p65/RelA. Cell extracts prepared from myc-CypA and HA-p65/RelA co-transfected cells were subjected to immunoprecipitation by anti-HA antibody, or with anti-myc antibody, followed by immunoblotting with anti-myc or anti-HA antibodies. (C) Mapping the region of p65/RelA required for interaction with CypA. The HA-tagged various truncations were co-transfected with myc-CypA into 293T cells. Cell lysates were immunoprecipitated with anti-myc antibody, followed by immunoblotting with anti-HA antibody. As shown in lane 6, the truncation of 2–221 retains binding activity. Furthermore, site-directed mutagenesis of p65's amino acid residues G170A/P172A/P176A prevented binding and interaction between NF-κB/p65 with CypA (compare lane 26 with lane 23; and compare lane 29 with lane 18). (D) Schematic representation of p65/RelA, its various truncations and site-directed mutants, and their binding activity. doi:10.1371/journal.pone.0096211.g002

acid residues between 170 and 176 in the p65 molecule are the functional binding sites of CypA.

### CypA Provides Protein Stability for NF-κB/p65 and Enhances Nuclear Translocation of p65

To directly address the possibility that CypA is necessary for protein stability of p65, we determined the stability of ectopically

expressed HA-tagged p65 and its mutant, p65 (G170A/P172A/P176A) (hereafter referred to as p65 mutant), which lacks CypA binding capability. HA-tagged LacZ was used as a control for co-transfection with HA-tagged p65 or its mutant. Co-transfected cells were treated with cyclohexamide for various time periods, followed by immunoblotting with anti-HA antibody and semi-quantification with ImageJ to determine relative p65 protein stability in the presence or absence of CypA binding. The results demonstrated that the half-life of the p65 mutant was considerably shorter (Fig. 3A), and amino residues 170–176 in p65 are necessary for CypA binding and for regulation of p65 protein stability. To provide evidence further, similar experiments were performed in MEF (*Ppia*<sup>-/-</sup>) cells. The results clearly show that

both WT and mutant p65 have shorter half lives in the CypA-negative MEF cells (Fig. 3B), suggesting that CypA is required for their stability.

It has been demonstrated that p65 protein stability is regulated by the ubiquitin-mediated proteolytic pathway [33]. Therefore, it is feasible to test whether ubiquitin-mediated proteolytic degradation is responsible for the instability of the p65 mutant, which is subjected to proteolysis in the absence of CypA protection. We compared p65 mutant protein stability in the presence or absence of proteasome inhibitor MG-132 in 293T cells and MEF (*Ppia*<sup>-/-</sup>). Cells treated with MG-132 had prolonged half-life of the p65 mutant protein (Figs. 3C, D), suggesting involvement of ubiquitin-mediated proteolysis.

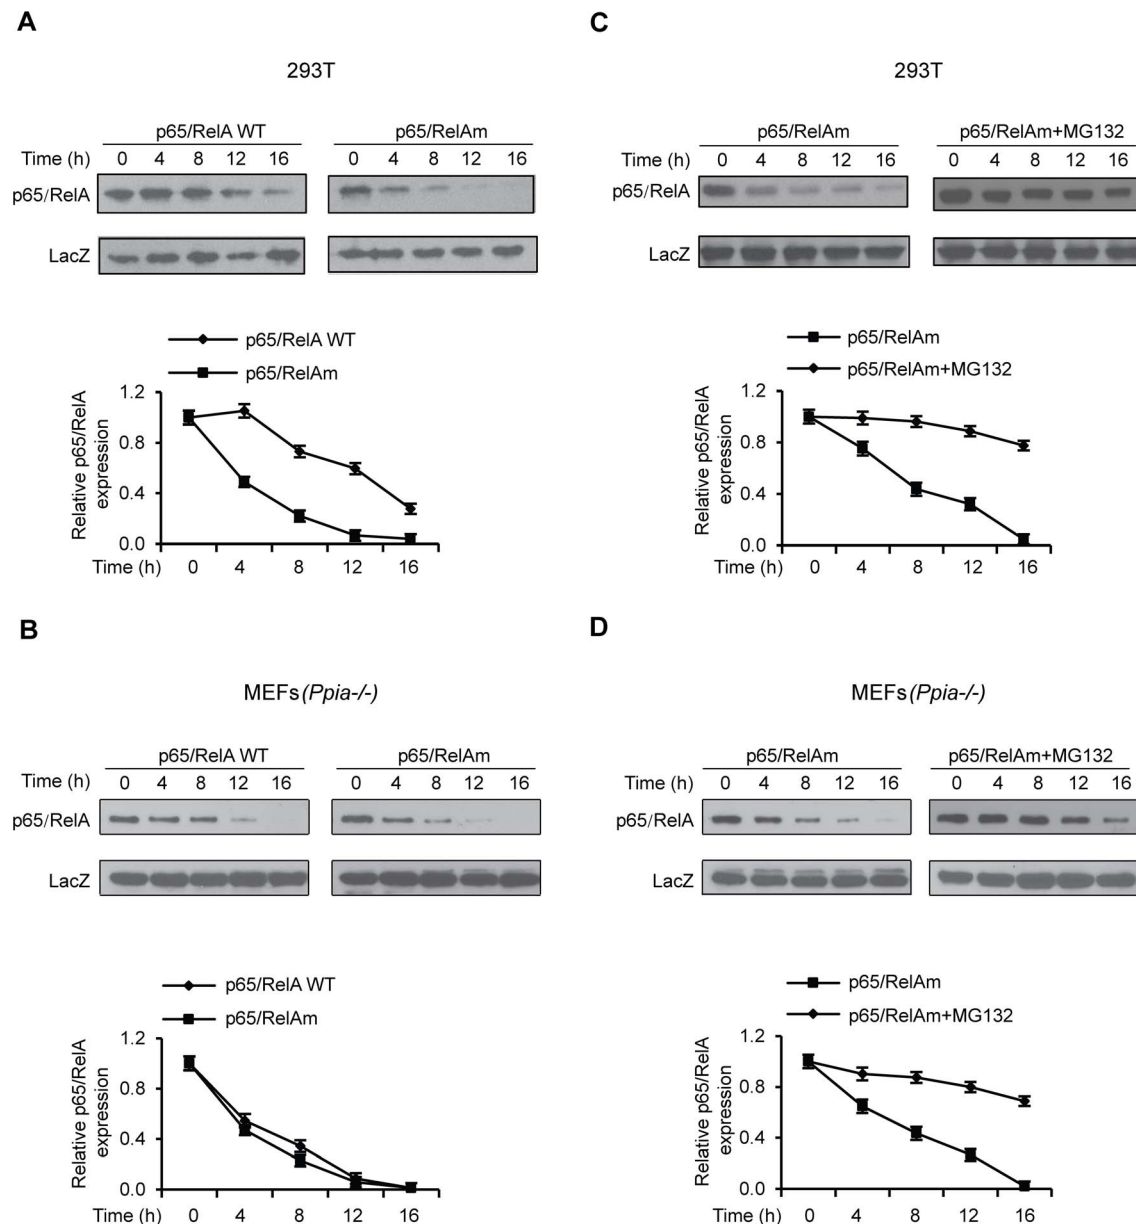

**Figure 3. p65/RelA protein stability.** (A) Comparison of p65/RelA and its mutant (p65 G170A/P172A/P176A) (p65/RelAm) stability in 293T cells. (B) Comparison of p65/RelAm stability in the presence or absence of proteasome inhibitor MG-132 in 293T cells. (C) Comparison of p65/RelA and its mutant stability in CypA-deficient MEF. (D) Comparison of p65/RelAm stability in the presence or absence of MG132 in CypA-deficient MEF. Relative protein stabilities were semi-quantified with ImageJ. doi:10.1371/journal.pone.0096211.g003

To examine the effects of CypA on p65 localization, red fluorescent protein-tagged p65 (pRed-p65) or its mutant (pRed-p65-mut) expression plasmids were co-transfected with the GFP-CypA expression plasmid into HeLa cells, followed by fluorescence microscopy to determine p65 localization. Cells stained with 4',6-Diamidino-2-Phenylindole (DAPI) were used as an indicator for nuclear localization. The results clearly demonstrated that CypA enhances Red-p65 but not the Red-p65mut for translocation into the nucleus (Figs. 4A and 4B). To examine the requirement of endogenous CypA for regulating p65 nuclear translocation, CypA<sup>+/+</sup> and CypA<sup>-/-</sup> MEFs were treated with TNF- $\alpha$  for 30 min, followed by immunofluorescence staining with anti-p65 antibody. TNF- $\alpha$ -untreated MEFs served as controls. Relative p65 fluorescence intensities in the nucleus were shown in *Ppia*<sup>+/+</sup> MEF but not in the *Ppia*<sup>-/-</sup> MEF after 30 min of TNF- $\alpha$  treatment (Fig. 4C). Together, these findings indicate that CypA enhances nuclear translocation of NF- $\kappa$ B/p65. To examine whether ectopic expression of CypA into CypA-negative MEF (*Ppia*<sup>-/-</sup>) could restore p65/RelA expression levels similar to those expressed in WT MEF (*Ppia*<sup>+/+</sup>), we performed Western blot analyses to compare expression levels of both CypA and p65/RelA between WT and CypA transfected CypA-deficient MEF (*Ppia*<sup>-/-</sup>). The

restored expression levels of CypA and p65 (both CE and NE) are similar to those expressed in WT MEF (Fig. 4D). These results further supported the notion that CypA provides protein stability for NF- $\kappa$ B/p65 and enhances nuclear translocation of p65/RelA.

### Endogenous CypA is Necessary for Full Activation of NF- $\kappa$ B in Response to Cytokine Stimulation

Ectopic expression of CypA enhances NF- $\kappa$ B activity (Fig. 5A). CypA R55A mutant retains less than 1% of the WT catalytic efficiency was used as controls. These results supported our observation for the effects of CypA on NF- $\kappa$ B nuclear translocation (Figs. 4A, B). Given that CypA enhances p65 nuclear localization, key questions raised are whether endogenous CypA is required for p65 nuclear localization, protein stability, and NF- $\kappa$ B signaling. To address these questions, we first compared NF- $\kappa$ B activation between wild-type C2C12 cells and CypA Kd clones, 1C2 and 2B6, in response to cytokines such TNF- $\alpha$  and IL-1 $\beta$ . Cells were transfected with wild-type  $\kappa$ B-Luc and mutant reporter for 24 hrs, and incubated with cytokines for 1 hr, followed by luciferase activity analysis (Fig. 5B). The results indicated that CypA Kd cells are resistant to cytokine-stimulated full activation of NF- $\kappa$ B, suggesting that CypA is required for full

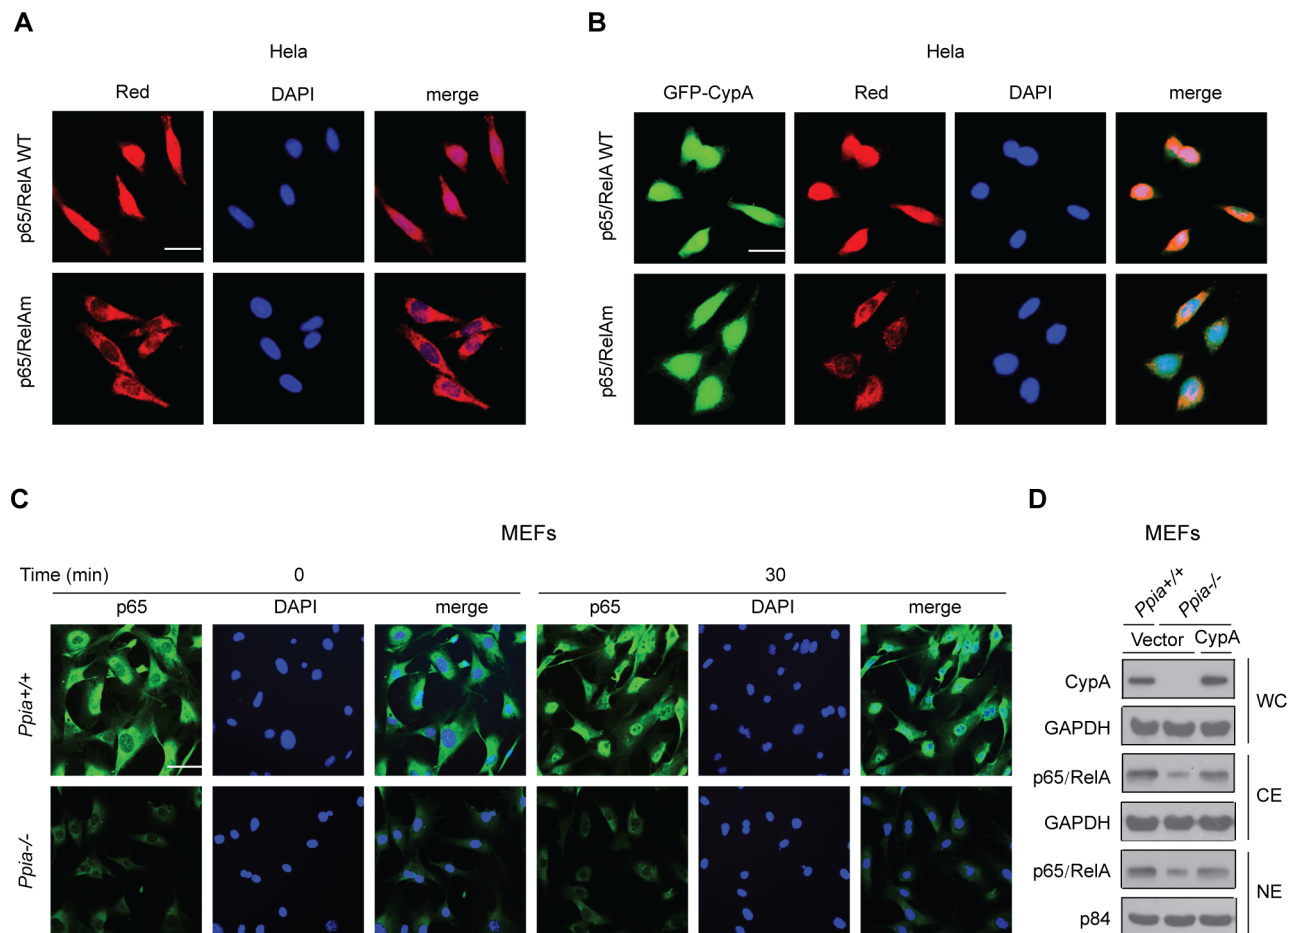

**Figure 4. CypA enhances NF- $\kappa$ B/p65 nuclear translocation.** (A) Nuclear translocation of p65/RelA but not the CypA-binding site mutant (p65/RelAm) induced by endogenous CypA. HeLa cells were transfected with pRed-p65/RelA and its mutant, and p65 location was determined by fluorescence microscopy. (B) HeLa cells were co-transfected with pRed-p65/RelA or pRed-p65/RelAm and GFP-CypA, and the locations of p65 and CypA were determined by fluorescence microscopy. (C) Comparison of the TNF- $\alpha$ -induced endogenous p65/RelA nuclear translocation in MEFs isolated from WT (*Ppia*<sup>+/+</sup>) and CypA KO (*Ppia*<sup>-/-</sup>). Relative intensity of p65/RelA in the nucleus was determined by fluorescence microscopy. (D) p65/RelA expression levels in CypA-deficient MEF were restored by ectopically expressed CypA. doi:10.1371/journal.pone.0096211.g004

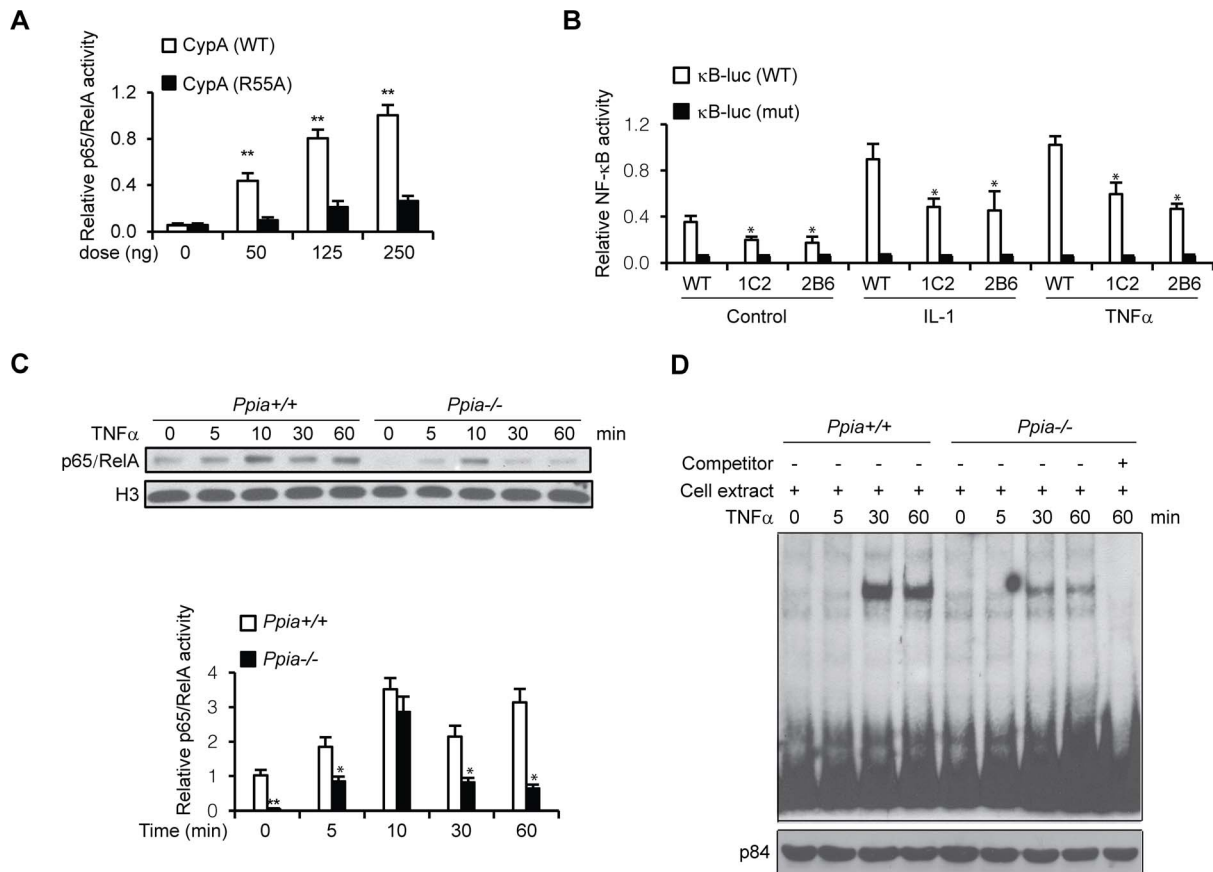

**Figure 5. CypA is associated with NF- $\kappa$ B binding and transcriptional activities.** (A) CypA activates  $\kappa$ B site-mediated luciferase activity in a dose-dependent manner. HeLa cells were transfected with indicated amounts of CypA, together with pGL4 nf- $\kappa$ B-Luc reporter constructs for 24 hrs, followed by luciferase activity assays. CypA (R55A) was used as negative control. (B) TNF- $\alpha$ -induced nuclear p65 levels degraded more quickly in MEFs isolated from *Ppia*<sup>-/-</sup> mice. MEFs were treated with TNF- $\alpha$  for the indicated times, and nuclear extracts were prepared for Western blot analysis for p65 expression levels. Histone H3 protein served as an internal control. (C) Reduced NF- $\kappa$ B binding activity associated with CypA KO MEFs. EMSAs were performed with nuclear extracts from MEFs isolated from WT (*Ppia*<sup>+/+</sup>) and CypA KO (*Ppia*<sup>-/-</sup>) mice. NF- $\kappa$ B oligos were used as a probe. For competition experiments, nuclear extracts were pre-incubated with 100-fold molar excess of unlabeled oligos at 25°C for 10 min before addition of labeled probes. P84 was used as an internal loading control. (D) CypA is required for cytokine-induced full activation of  $\kappa$ B-Luc activity. C2C12 cells and CypA Kd clones 1C2 and 2B6 were transfected with wild-type (WT) or mutant (MUT) pGL4 nf- $\kappa$ B-Luc reporter constructs, followed by treatment with IL-1 $\alpha$  or TNF- $\alpha$ . Cells were harvested for luciferase assays.  
doi:10.1371/journal.pone.0096211.g005

activation of NF- $\kappa$ B in response to cytokine stimulation. We next investigated the molecular mechanisms underlying the response of WT (*Ppia*<sup>+/+</sup>) and CypA KO (*Ppia*<sup>-/-</sup>) MEFs to cytokine signaling, and examined the levels of nuclear p65 at various time points after cells were treated with TNF- $\alpha$ . Nuclear fractions prepared at various time points were subjected to immunoblotting with anti-p65 and histone 3 (H<sub>3</sub>) antibodies. In WT cells, cytokine-activated nuclear p65 levels accumulated for up to 60 minutes, while nuclear p65 was rapidly degraded in CypA-deficient MEFs after peaking at 10 minutes, suggesting that CypA is required for stabilized activated NF- $\kappa$ B/p65 (Fig. 5C). We also performed EMSA to examine the effect of CypA on NF- $\kappa$ B DNA-binding activity, and found that it was significantly increased in the TNF- $\alpha$ -treated WT MEF nuclear extracts, but not in the TNF- $\alpha$ -treated CypA-deficient MEF nuclear extracts (Fig. 5D). These data indicate that endogenous CypA is required for nuclear localization and protein stability.

To determine whether CypA Kd can affect expression of cytokines such IL-8, IL-1 and IL-6 in the glioblastoma cell line, U87vIII, real-time RT-PCR was performed to assess cytokine expression in the CypA Kd single clones, Ud-12 and Ud-3, as

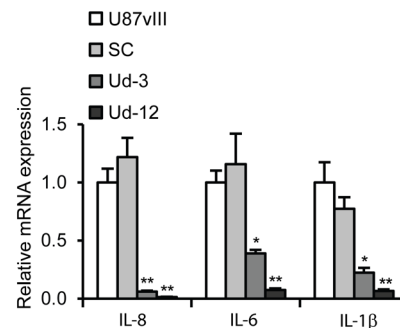

**Figure 6. CypA Kd-mediated down-regulation of IL-8, IL-6, and IL-1 $\beta$  expression.** IL-8, IL-6, and IL-1 $\beta$  expression levels were determined by a quantitative real-time PCR (qRT-PCR) analysis. One microgram of total RNA was used for cDNA synthesis with Superscript III (Invitrogen) and the oligo(dT)15 primer. qRT-PCR was performed using the Power SYBR Green PCR Master Mix (Applied Biosystems, Foster City, CA) detected by the 7300 Real Time PCR System (Applied Biosystems). The relative expression levels of IL-8, IL-6, and IL-1 $\beta$  mRNA were normalized to the internal reference 18S rRNA.  
doi:10.1371/journal.pone.0096211.g006



compared to the parental cells and scrambled clone. As shown in Fig. 6, expression of IL-8, IL-1, and IL-6 in Ud-12 and Ud-3 cells was significantly attenuated compared to parental U87vIII control cells. In combination, these results and the data shown in Fig. 1 clearly demonstrate that CypA Kd results in suppressed activation of NF- $\kappa$ B and down-regulates cytokines that are involved in inflammation, proliferation, and angiogenesis [36–38].

## Discussion

Knock-down and knock-out of the peptidyl-prolyl isomerase CypA, a *Ppia* gene product, led to reduced NF- $\kappa$ B activity and signaling output. The regulatory role of CypA on NF- $\kappa$ B was further corroborated by enhanced NF- $\kappa$ B/p65 (RelA) nuclear localization, stability, and the levels of NF- $\kappa$ B activity. These findings highlight important functions of CypA in NF- $\kappa$ B signaling, and suggest that CypA could be an important contributor to elevated NF- $\kappa$ B in tumors, as previously reported by us and others [27,34,35]. In this study, CypA was identified as a novel interactor of the NF- $\kappa$ B subunit p65/RelA. Both *in vitro* binding assays and *in vivo* co-immunoprecipitation confirmed the physical association between CypA and NF- $\kappa$ B/p65. Systematic analysis of different regions of p65/RelA that may be involved in interaction with CypA revealed that N-terminal truncation 1 (A-fragment), spanning amino acid residues 1–221, was the only region of p65/RelA that interacts with CypA. The NCBI Protein Data Bank shows that truncation 1 of p65/RelA contains two proline-rich motifs, PPHRPHP and PSGRPLRLP (Fig. 2D), which are CypA-binding consensus sequence-like motifs. Site-directed mutagenesis of the potential CypA-binding consensus sequence, PSGRPLRLP, results in disruption of the protein-protein interactions between CypA and p65/RelA. These results demonstrated that amino acid residues between 170 and 176 in the p65/RelA molecule are the functional binding sites of CypA.

Our data indicate that the N-terminal region of p65/RelA is involved in its interaction with CypA. The interacting domain of CypA (amino acid residues 1–20) does not overlap with the C<sub>s</sub>A ligand-binding region (down-stream to H54) [29,39]; therefore, CypA retains isomerase activity when it binds to p65/RelA. This isomerase activity might be required for proper configuration to stabilize proteins to avoid proteolysis of p65/RelA. Given the ability of CypA to enhance NF- $\kappa$ B activity, this activation might be independent of I $\kappa$ B $\alpha$  phosphorylation by IKK. The study conducted in human monocytic leukemia cell line THP-1 demonstrated that CypA induces degradation of I $\kappa$ B and nuclear translocation of NF- $\kappa$ B [23]. However, our data demonstrate that CypA enhances NF- $\kappa$ B DNA-binding and transcription activity, and increases nuclear translocation, but we did not detect

degradation of I $\kappa$ B $\alpha$ . Evidence of ectopically expressed CypA led to reduced p65/RelA bound by I $\kappa$ B $\alpha$ . Therefore, CypA could hijack the p65-p50 complex and translocate into the nucleus, and the stabilized NF- $\kappa$ B complex leads to increased transcription activity.

We report here for the first time that CypA is the only protein that interacts with the N-terminal region of the RH domain of p65/RelA. Parvulin-like human Pin1 also binds to p65/RelA at the phosphorylated Threonine residue in the Thr254-Pro motif [33]. Despite different substrate recognition motifs, similar biological functions for CypA and Pin1 binding to p65/RelA have been observed to increase p65 nuclear translocation and protein stability, and to enhance NF- $\kappa$ B activity [33]. This supports the hypothesis that PPIases have some features in common, allowing them to occasionally complement each other. Considerable up-regulation of CypA and Pin1 in most tumors is frequently associated with tumor aggressiveness, which could be due to up-regulated NF- $\kappa$ B activity. Therefore, these PPIases are candidates for anti-cancer targets for intervention by small molecule inhibitors. However, their success may well depend upon the development of combined isozyme-, tissue-, and organelle-specific inhibitors for enzyme-catalyzed prolyl bond isomerizations.

Our data demonstrated that CypA Kd significantly reduces IL-1, IL-6, and IL-8 expression, suggesting that CypA mediates NF- $\kappa$ B activity to regulate its downstream gene expression. Since these cytokines may confer tumor cell growth advantage in the neoplastic microenvironment [36–38], a strategy to reverse these effects might offer attractive options for novel therapeutics. In conclusion, these findings provide definitive evidence to support the integration of CypA into the NF- $\kappa$ B transcriptional complex via direct interaction with p65/RelA and its crucial role for NF- $\kappa$ B accumulation and activation inside the nucleus. Specific inhibitors for CypA in tumor cells might represent a therapeutic target for the control of excess NF- $\kappa$ B activity.

## Acknowledgments

We thank Dr. Abrose Jong (Children's Hospital, USC) for reading the manuscript and Prof David Wong (UCLA Dental and Craniofacial Research Institute) for his support. We are grateful to So Yyun Park for excellent technical assistance.

## Author Contributions

Conceived and designed the experiments: SS KKY RHC. Performed the experiments: SS JBZ MG AH. Analyzed the data: SS JBZ MG RHC. Contributed reagents/materials/analysis tools: KKY. Wrote the paper: RHC MG AH.

## References

- Karin M, Greten FR (2005) NF- $\kappa$ B: linking inflammation and immunity to cancer development and progression. *Nat Rev Immunol* 5:749–759.
- Vallabhapurapu S, Karin M (2009) Regulation and function of NF- $\kappa$ B transcription factors in the immune system. *Annu Rev Immunol* 27:693–733.
- Baldwin AS Jr (2001) Series introduction: the transcription factor NF- $\kappa$ B and human disease. *J Clin Invest* 107:3–6.
- Karin M, Cao Y, Greten FR, Li ZW (2002) NF- $\kappa$ B in cancer: from innocent bystander to major culprit. *Nat Rev Cancer* 2:301–310.
- Courtois G, Gilmore TD (2006) Mutations in the NF- $\kappa$ B signaling pathway: implications for human disease. *Oncogene* 25:6831–6843.
- Karin M, Ben-Neriah Y (2000). Phosphorylation meets ubiquitination: the control of NF- $\kappa$ B activity. *Annu. Rev. Immunol* 18:621–663.
- Hayden MS, Ghosh S (2008) Shared principles in NF- $\kappa$ B signaling. *Cell* 132:344–362.
- Chen LF, Greene WC (2004) Shaping the nuclear action of NF- $\kappa$ B. *Nat Rev Mol Cell Biol* 5:392–401.
- Gerritsen ME, Williams AJ, Neish AS, Moore S, Shi Y, et al. (1997) CREB-binding protein/p300 are transcriptional coactivators of p65. *Proc Natl Acad Sci USA* 94:2927–2932.
- Chan HM, La Thangue NB (2001) p300/CBP proteins: HATs for transcriptional bridges and scaffolds. *J Cell Sci* 114(Pt 13):2363–2373.
- Wu Z, Li Y, Li X, Ti D, Zhao Y, et al. (2011) LRP16 Integrates into NF- $\kappa$ B Transcriptional Complex and Is Required for Its Functional Activation. *PLoS ONE* 6:e18157.
- Fischer G, Aumüller T (2003) Regulation of peptide bond cis/trans isomerization by enzyme catalysis and its implication in physiological processes. *Rev Physiol Biochem Pharmacol* 148:105–150.
- Kruse M, Brunke M, Escher A, Szalay AA, Tropschug M, et al. (1995) Enzyme Assembly after *de Novo* Synthesis in Rabbit Reticulocyte Lysate Involves Molecular Chaperones and Immunophilins. *J Biol Chem* 270:2588–2594.
- Handschumacher RE, Harding MW, Rice J, Drugge RJ, Speicher DW (1984) Cyclophilin: a specific cytosolic binding protein for cyclosporin A. *Science* 226:544–547.

15. Bram RJ, Hung DT, Martin PK, Schreiber SL, Crabtree GR (1993) Identification of the immunophilins capable of mediating inhibition of signal transduction by cyclosporine A and FK506: roles of calcineurin binding and cellular location. *Mol Cell Biol* 13:4760–4769.
16. Colgan J, Asmal M, Yu B, Luban J (2005) Cyclophilin A-deficient mice are resistant to immunosuppression by cyclosporine. *J Immunol* 174:6030–6038.
17. Nishiyama S, Manabe N, Kubota Y, Ohnishi H, Kitanaka A, et al. (2005) Cyclosporin A inhibits the early phase of NF- $\kappa$ B/RelA activation induced by CD28 costimulatory signaling to reduce the IL-2 expression in human peripheral T cells. *Int Immunopharmacol* 5:699–710.
18. Du S, Hiramatsu N, Hayakawa K, Kasai A, Okamura M, et al. (2009) Suppression of NF- $\kappa$ B by cyclosporine A and tacrolimus (FK506) via induction of C/EBP family: implication for unfolded protein response. *J Immunol* 182:7201–7211.
19. Lu KP, Finn G, Lee TH, Nicholson LK (2007) Prolyl *cis-trans* isomerization as a molecular timer. *Nat Chem Biol* 3:619–629.
20. Colgan J, Asmal M, Neagu M, Yu B, Schneidkraut J, et al. (2004) Cyclophilin A regulates TCR signal strength in CD4+ T cells via a proline-directed conformational switch in Itk. *Immunity* 21:189–201.
21. Song J, Lu Y-C, Yokoyama K, Rossi J, Chiu R (2004) Cyclophilin A is required for retinoic acid-induced neuronal differentiation in p19 cells. *J Biol Chem* 279:24414–24419.
22. Zhu C, Wang X, Deinum J, Huang Z, Gao J, et al., (2007) Cyclophilin A participates in the nuclear translocation of apoptosis-inducing factor in neurons after cerebral hypoxia-ischemia. *J Exp Med* 204:1741–1748.
23. Pan H, Luo C, Li R, Qiao A, Zhang L, et al. (2008) Cyclophilin A is required for CXCR4-mediated nuclear export of heterogeneous nuclear ribonucleoprotein A2 activation and nuclear translocation of ERK1/2, and chemotactic cell migration. *J Biol Chem* 283:623–637.
24. Bauer K, Kretschmar AK, Cvijic H, Blumert C, Löffler D, et al., (2009) Cyclophilins contribute to Stat3 signaling and survival of multiple myeloma cells. *Oncogene* 28:2784–2795.
25. Kim H, Kim WJ, Jeon ST, Koh EM, Cha HS, et al., (2005) Cyclophilin A may contribute to the inflammatory processes in rheumatoid arthritis through induction of matrix degrading enzymes and inflammatory cytokines from macrophages. *Clin Immunol* 116:217–224.
26. Chen S, Zhang M, Ma H, Saiyin H, Shen S, et al., (2008) Oligo-microarray analysis reveals the role of cyclophilin A in drug resistance. *Cancer Chemother Pharmacol* 61:459–469.
27. Sun S, Wang Q, Qiang A, Cheng C, Soo C, et al. (2011) Knockdown of CypA inhibits interleukin-8 (IL-8) and IL-8-mediated proliferation and tumor growth of glioblastoma cells through down-regulated NF- $\kappa$ B. *J Neurooncol* 101:1–14.
28. Xu J (2005) Preparation, culture, and immortalization of mouse embryonic fibroblasts. *Curr Protoc Mol Biol* 28:28.1.1–28.1.3.
29. Cui Y, Mirkia K, Fu Y-HF, Zhu L, Yokoyama KK, et al. (2002) Interaction of the Retinoblastoma Gene Product, RB, With Cyclophilin A Negatively Affects Cyclosporin-Inhibited NFAT Signaling. *J Cell Biochem* 86:630–641.
30. Chiu R, Rey O, Zheng JQ, Twiss JL, Song J, et al. (2003) Effects of Altered Expression and Localization of Cyclophilin A on Differentiation of p19 Embryonic Carcinoma Cells. *Cell Mol Neurobiol* 23:929–943.
31. Li Q, Verma IM (2002) NF- $\kappa$ B regulation in immune system. *Nat Rev Immunol* 2:725–734.
32. Mamane Y, Sharma S, Petropoulos L, Lin R, Hiscott J (2000) Posttranslational regulation of IRF-4 activity by the immunophilin FKBP52. *Immunity* 12:129–140.
33. Ryo A, Suizu F, Yoshida Y, Perrem K, Liou YC, et al., (2003) Regulation of NF- $\kappa$ B signaling by Pin1-dependent prolyl isomerization and ubiquitin-mediated proteolysis of p65/RelA. *Mol Cell* 12:1413–1426.
34. Lee J (2010) Role of cyclophilin A during oncogenesis. *Arch Pharm Res* 33:181–178.
35. Obchoei S, Wongkhan S, Wongkham C, Li M, Yao Q, et al (2009) Cyclophilin A: potential functions and therapeutic target for human cancer. *Med Sci Monit* 15:RA221–232.
36. Brat DJ, Bellail AC, Van Meir EG (2005) The role of interleukin-8 and its receptors in gliomagenesis and tumoral angiogenesis. *Neuro Oncol* 7:122–133.
37. Park EJ, Lee JH, Yu GY, He G, Ali SR, et al., (2010) Dietary and genetic obesity promote liver inflammation and tumorigenesis by enhancing IL-6 and TNF expression. *Cell* 140:197–208.
38. Kasza A (2013) IL-1 and EGF regulate expression of genes important in inflammation and cancer. *Cytokine* 62:22–33.
39. Zydowsky LD, Etkorn FA, Chang HY, Ferguson SB, Stolz LA, et al. (1992) Active site mutants of human cyclophilin A separate peptidyl-prolyl isomerase activity from cyclosporine A binding and calcineurin inhibition. *Protein Sci* 1:1092–1099.
